# Supplementary material for: Pseudobombax parvifolium Hydroalcoholic Bark Extract: Chemical Characterisation and Cytotoxic, Mutagenic, and Preclinical Aspects Associated with a Protective Effect on Oxidative Stress
Source: MDPI journal article supplement (doi:10.3390/metabo13060748), 2023-06-13

## **Supplementary material**

Comparison between library GNPS and query spectra of  
phytochemicals identified by LC-MS/MS analyses

Comparison between library GNPS (bottom) and query spectra phytocomponents identified in EBHE (top). The structure of the phytocomponent identified is represented.

### Catechin 7-arabinofuranoside

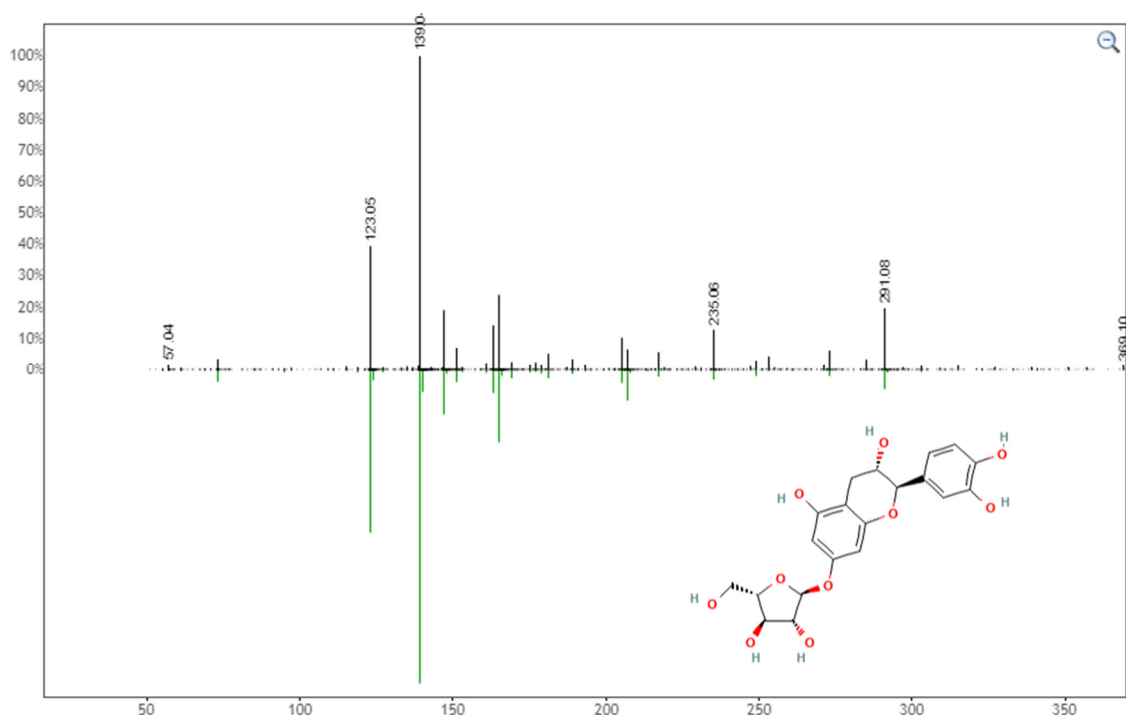

### Glycoside: (NCGC00384749-012-[[5-(4-hydroxy-3,5-dimethoxyphenyl)-6,7-bis(hydroxymethyl)-1,3-dimethoxy-5,6,7,8-tetrahydronaphthalen-2-yl]oxy]-6-(hydroxymethyl)oxane-3,4,5-triol)

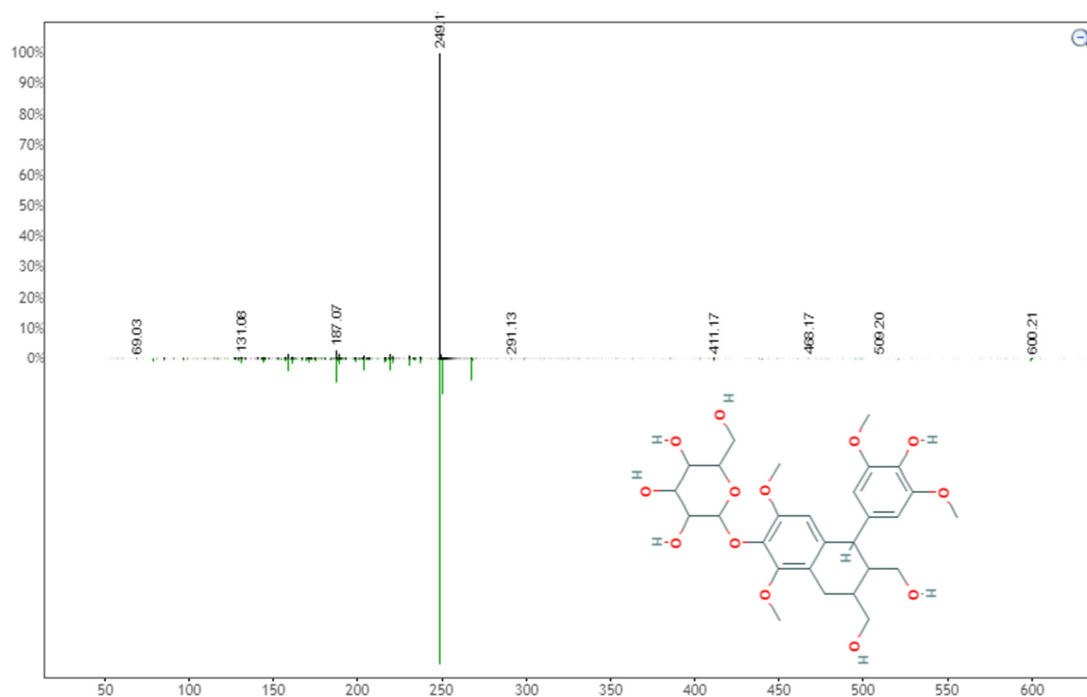

# Loliolide

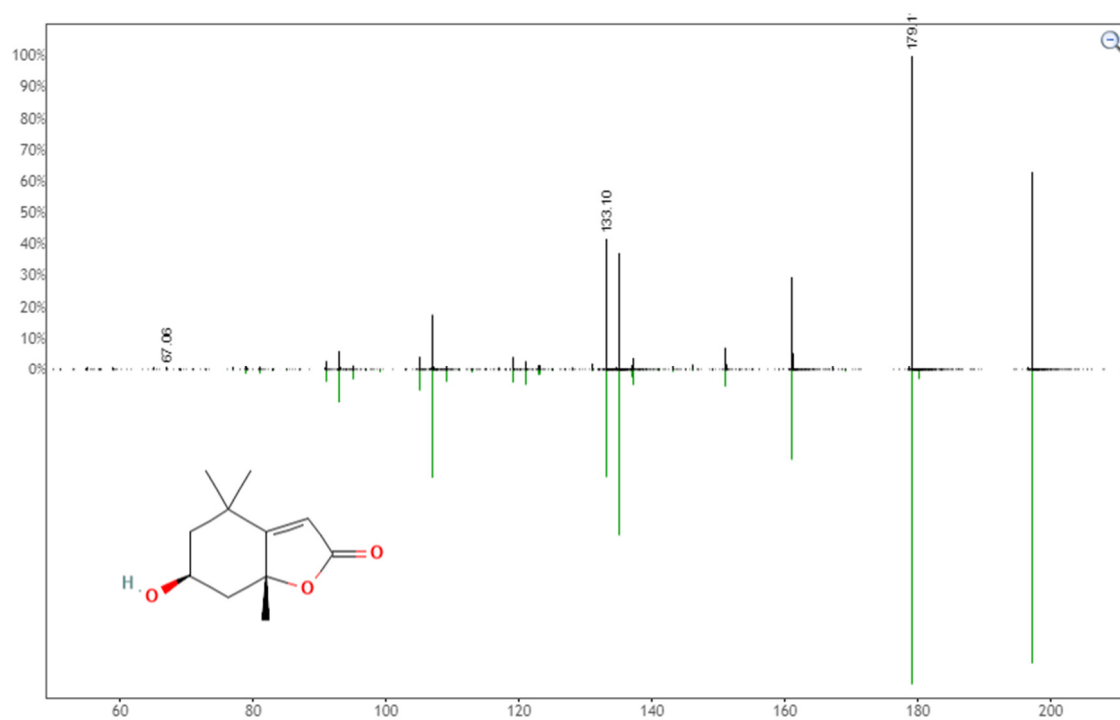

## The whole chromatogram (until 10 min)

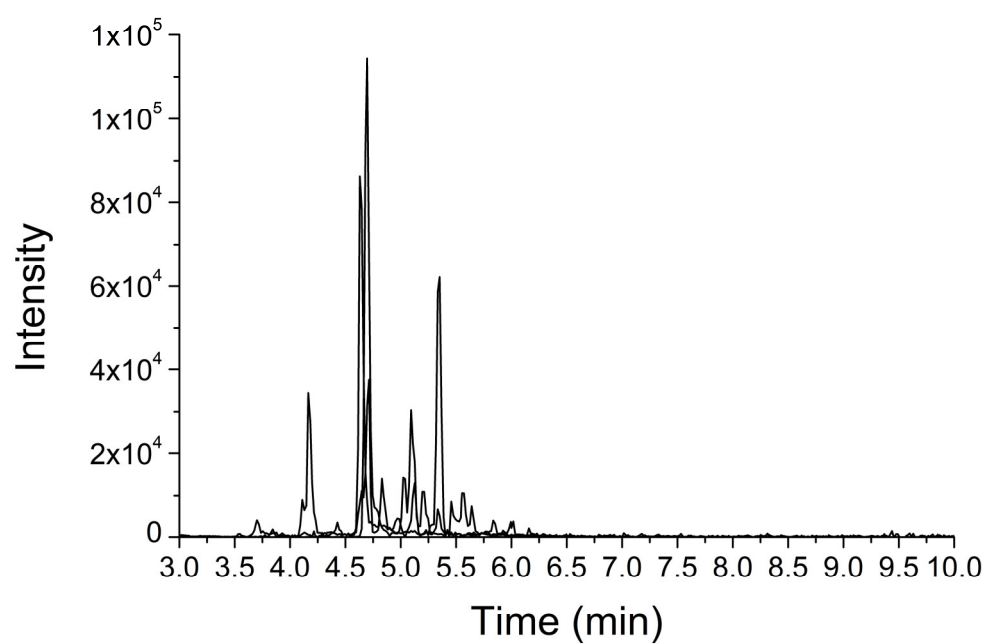

Supplement: s1 [file s1]
